# Supplementary figures and images for: A Population Pharmacokinetic Model Does Not Predict the Optimal Starting Dose of Tacrolimus in Pediatric Renal Transplant Recipients in a Prospective Study: Lessons Learned and Model Improvement
Source: Springer Nature journal article supplement (doi:10.1007/s40262-019-00831-8), 2019-10-26

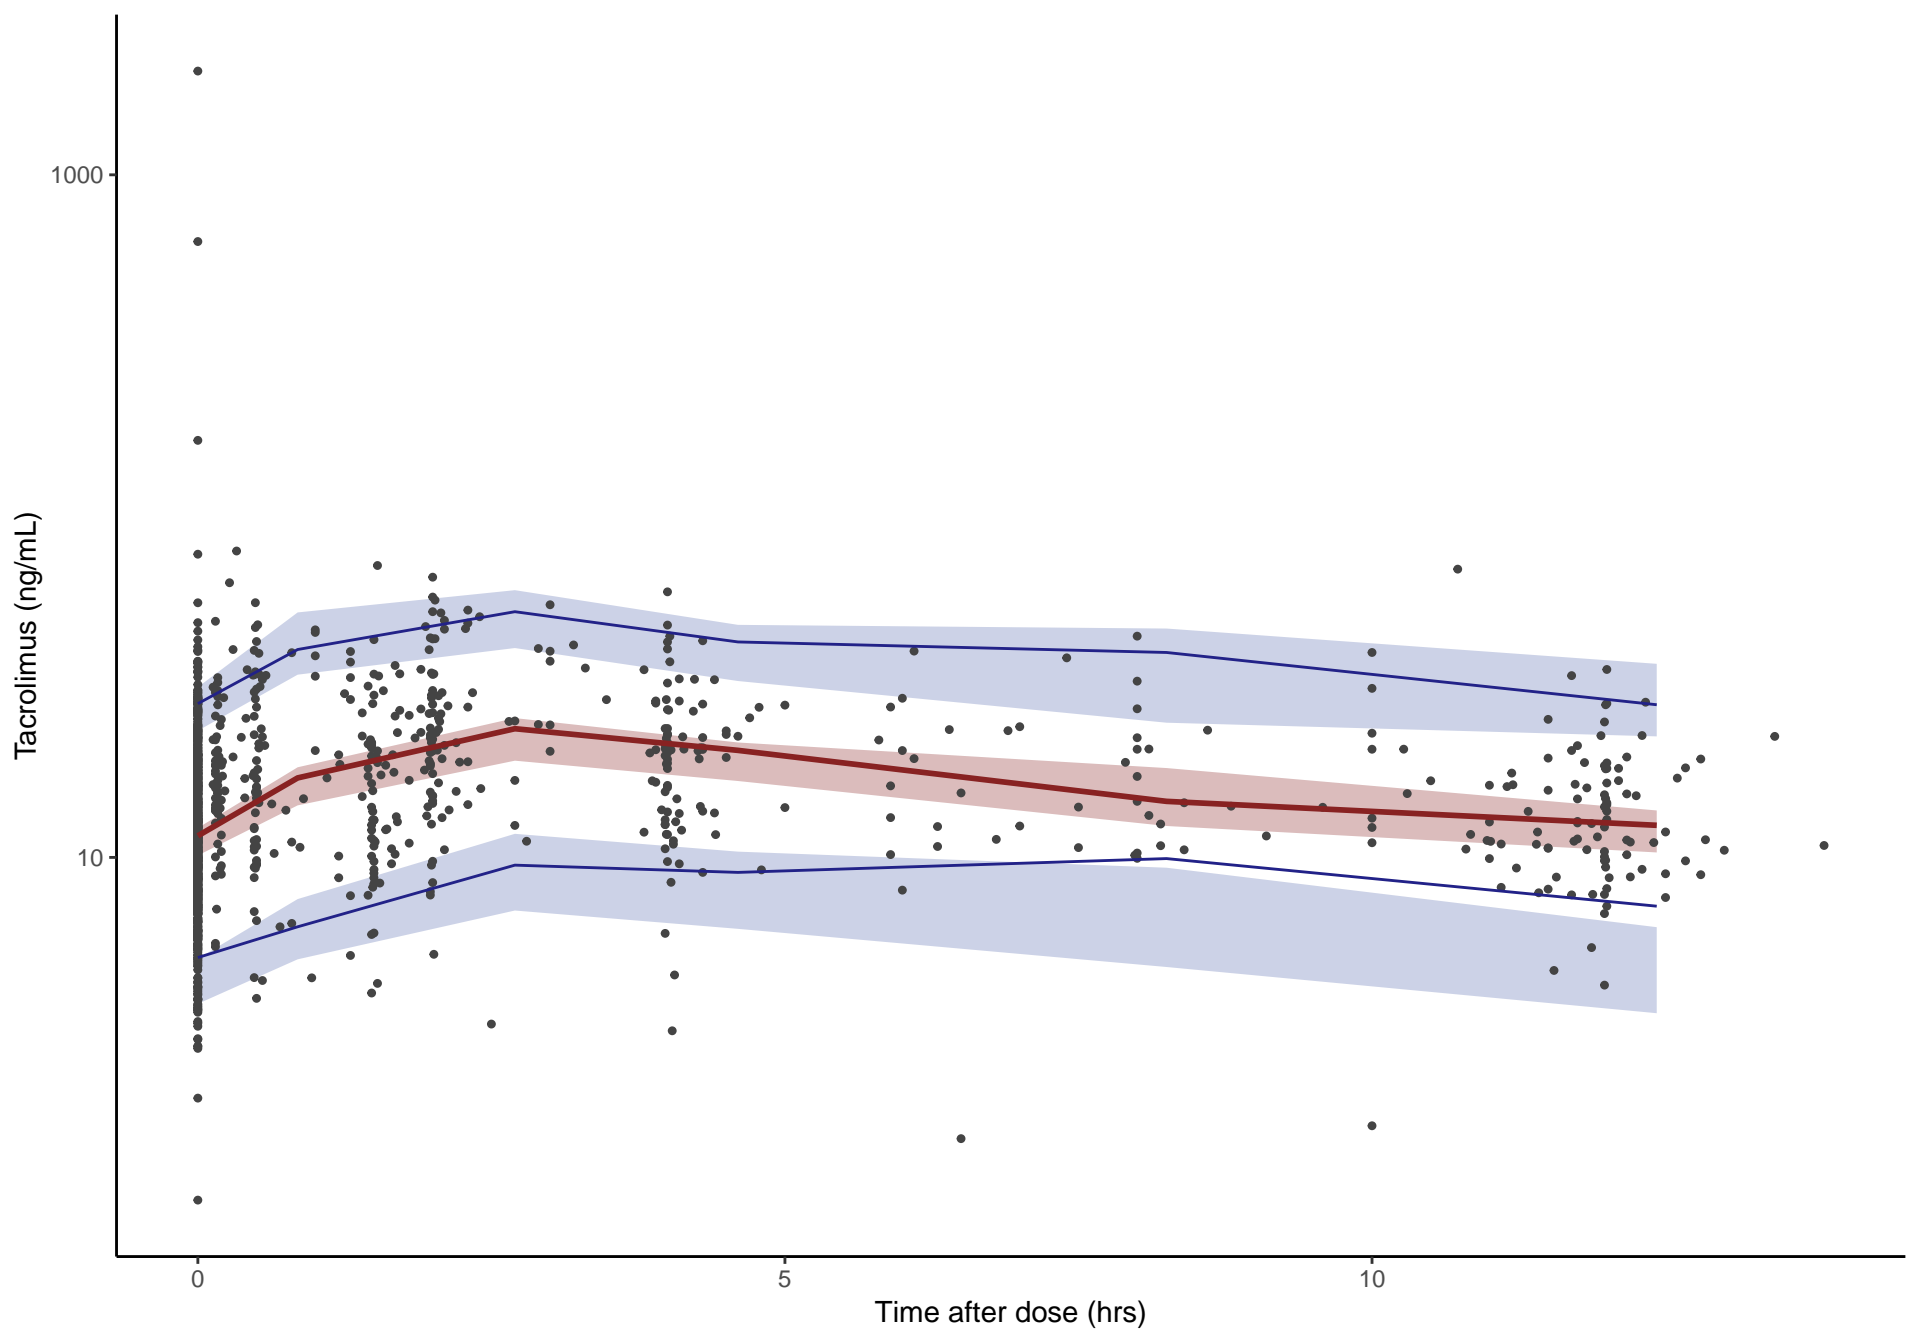

Supplement: MOESM2 [file 17310842]

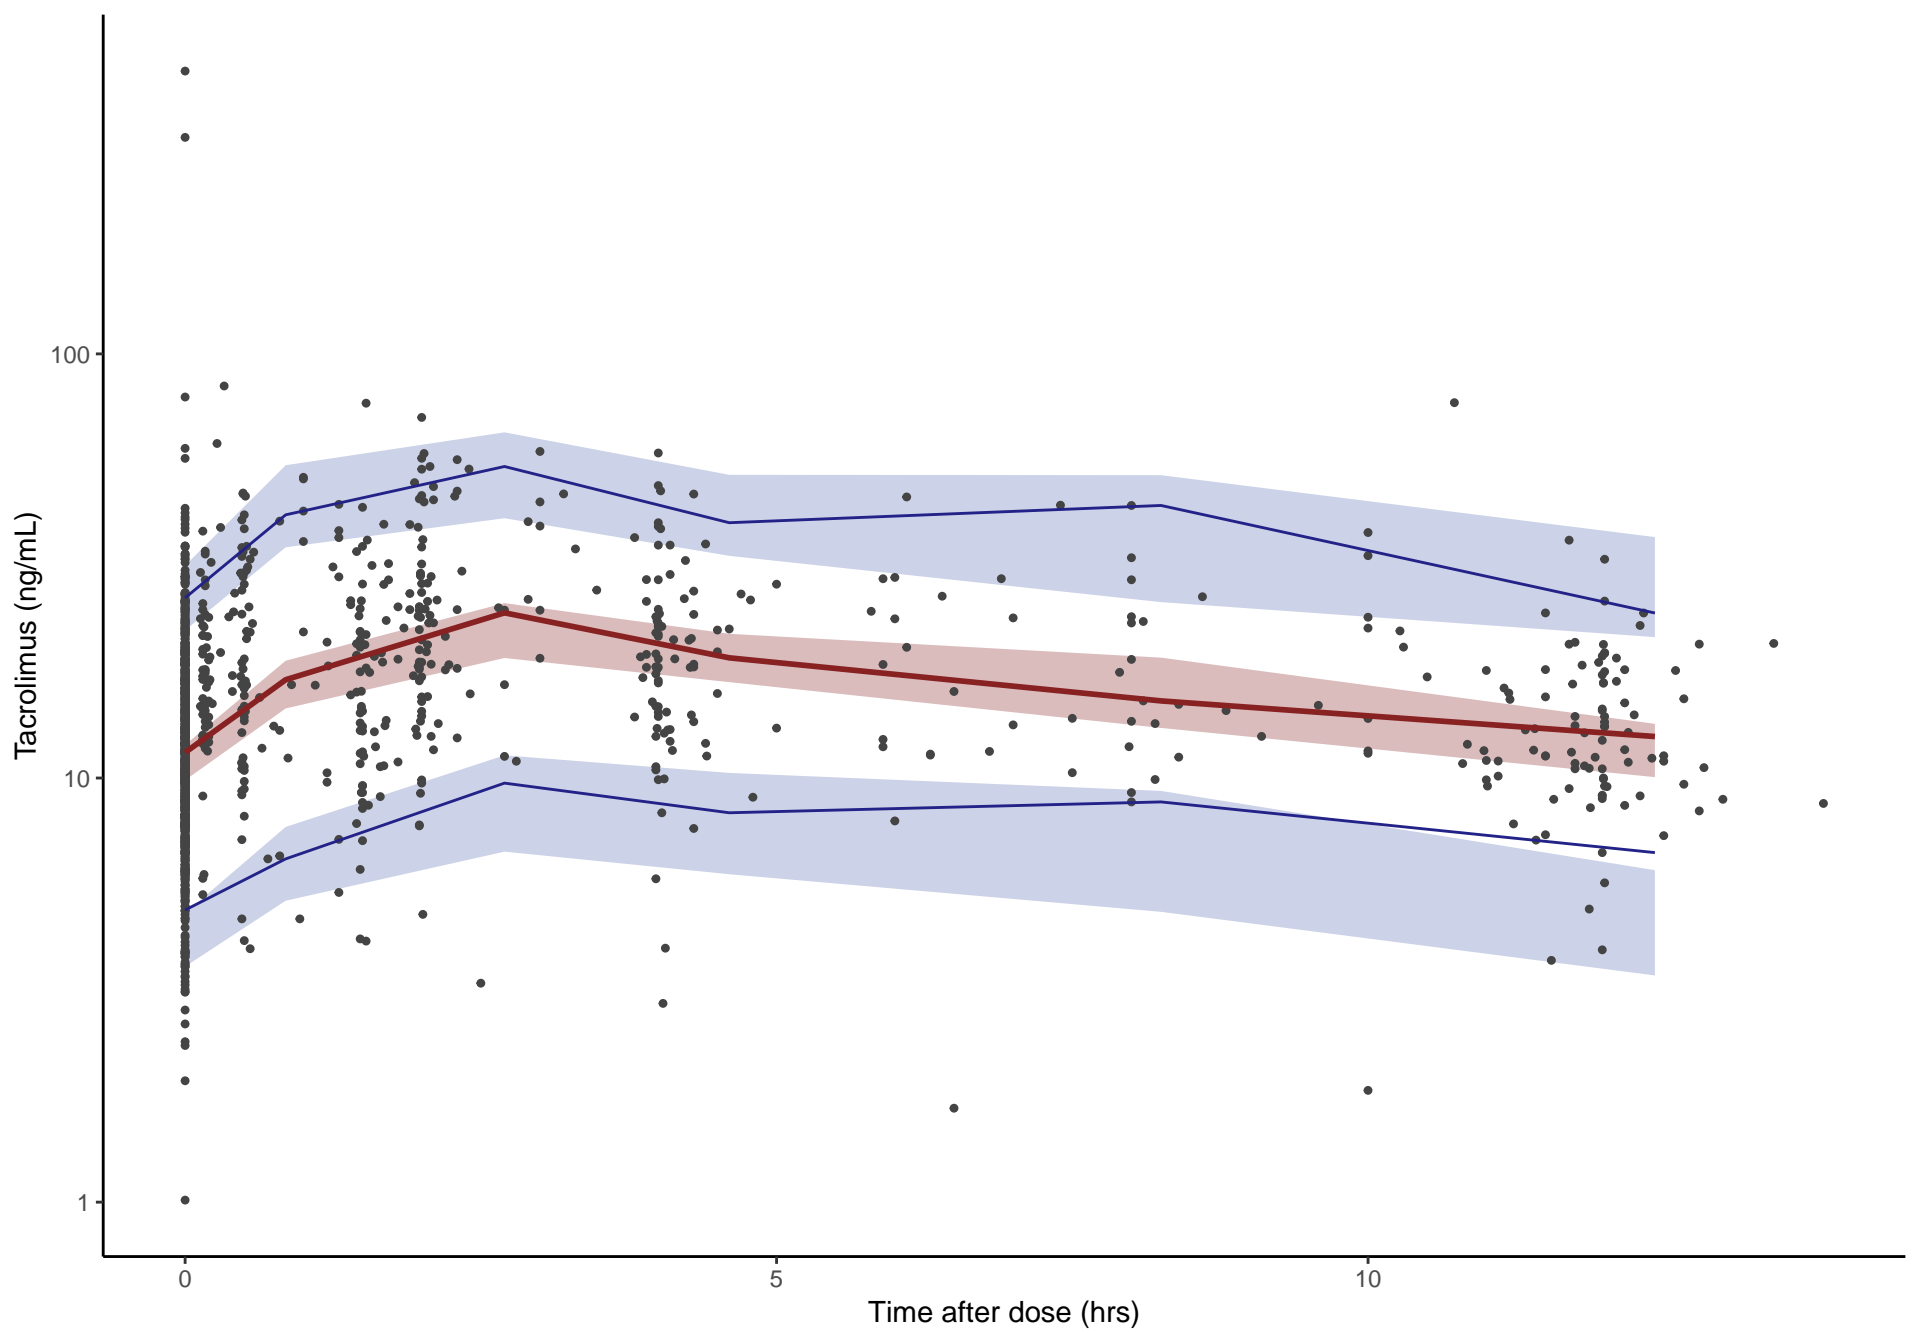

Supplement: MOESM3 [file 17310842]

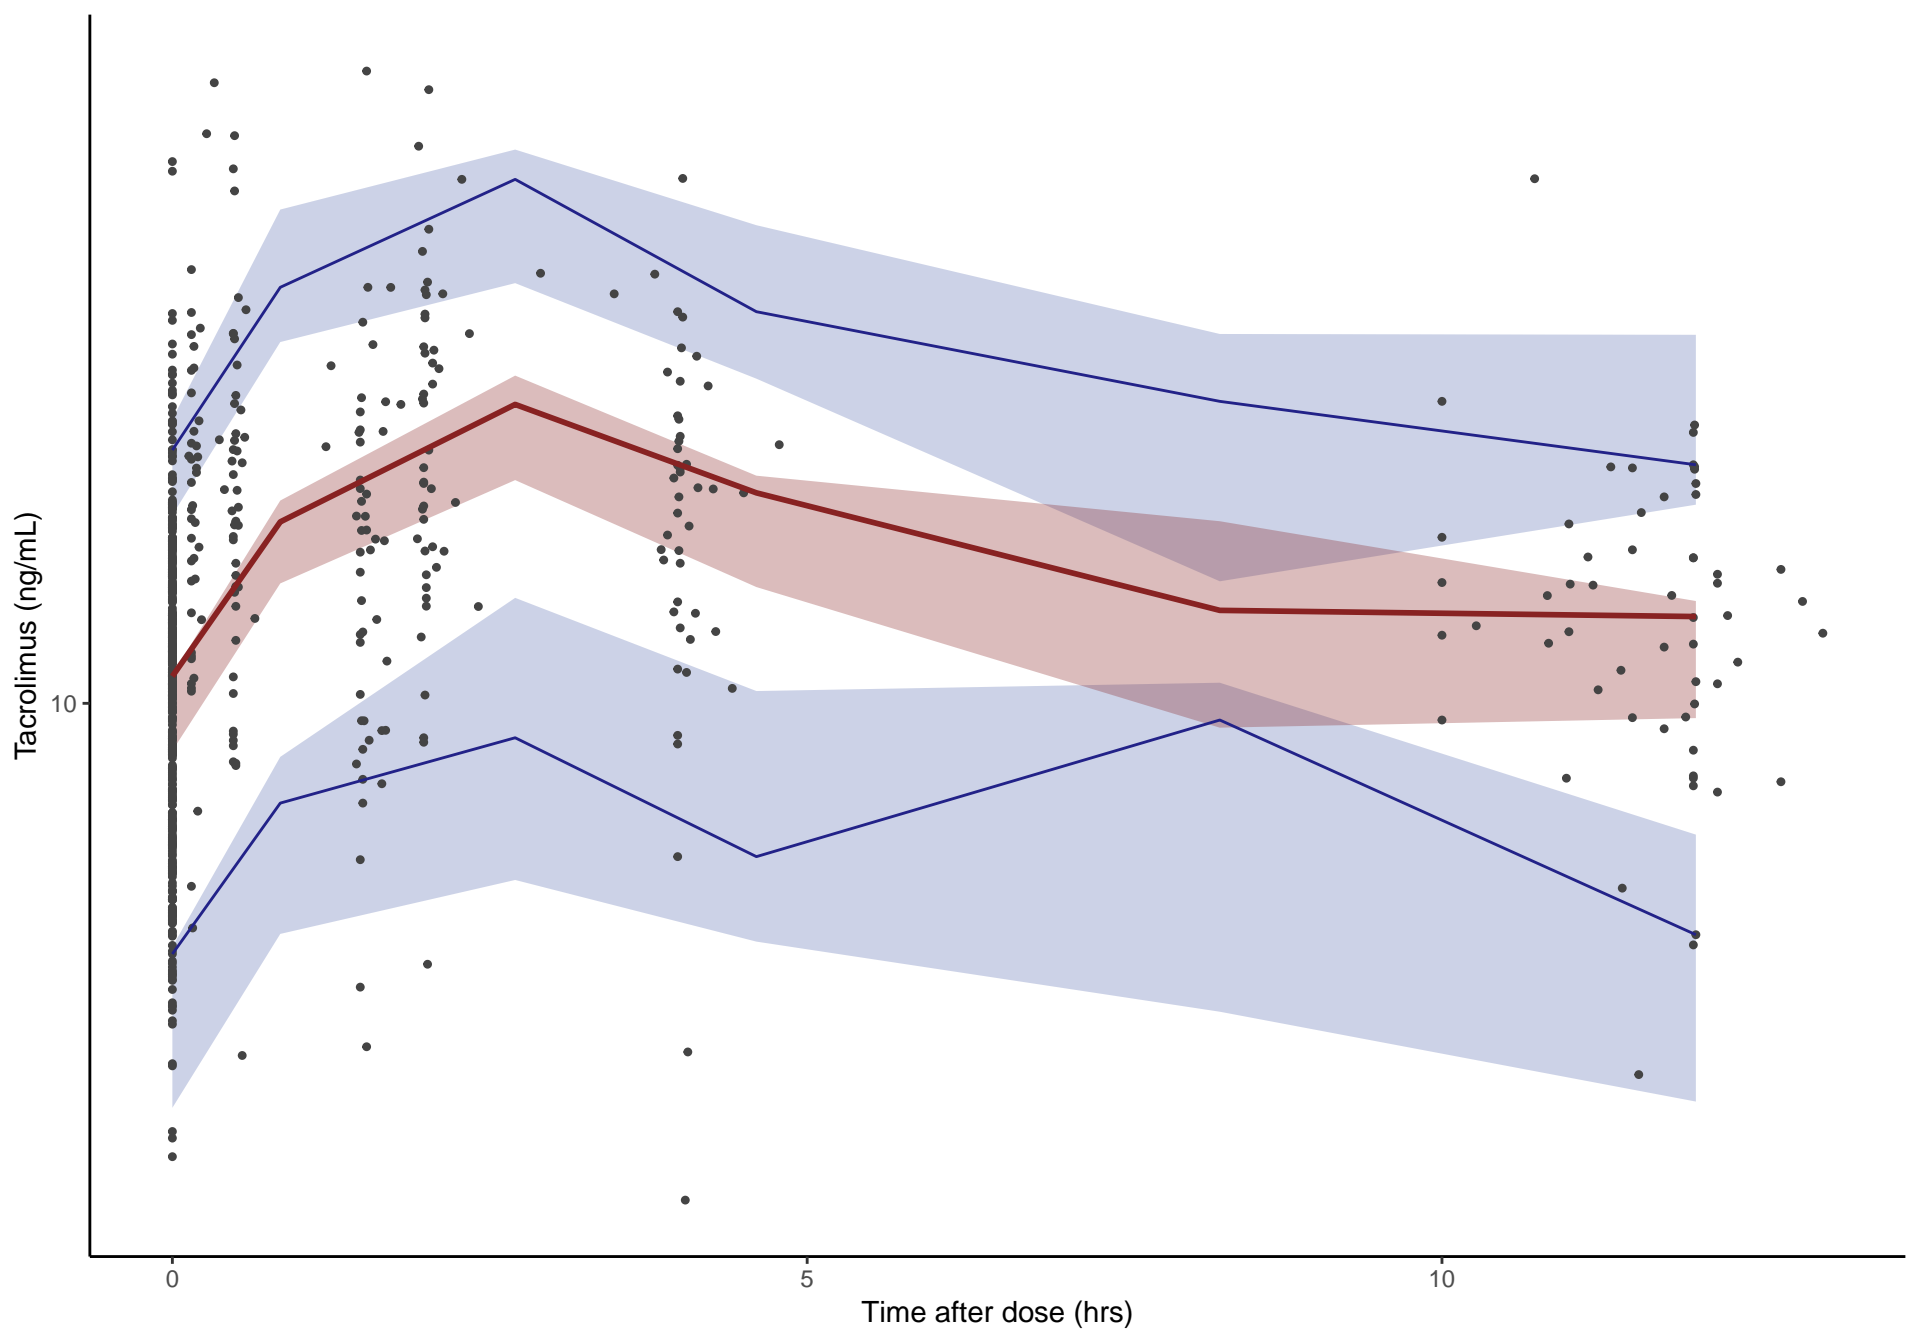

Supplement: MOESM8 [file 17310842]
